# Supplementary material
Source: publisher figshare collection journal article supplement (https://acs.figshare.com/ndownloader/files/4275570)
Supplement: Supplementary file 1 [file 4275570]

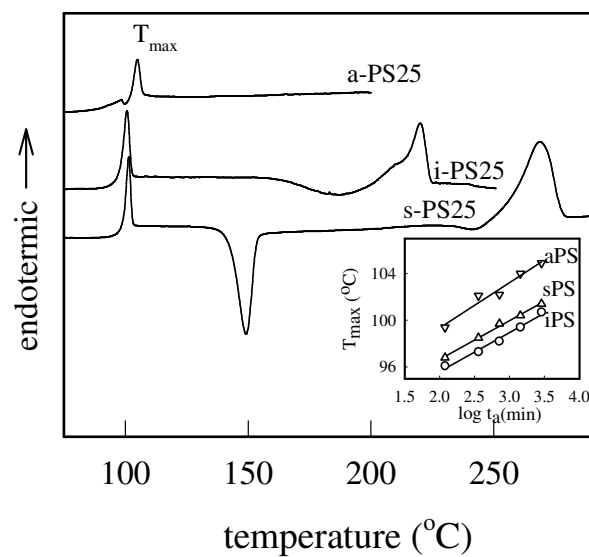

**Figure S3.** DSC heating curves of melt-quenched samples annealed at 75°C for 48 h. The peak temperature of the enthalpy-recovery endotherm denotes  $T_{max}$  and the inset shows the variation of  $T_{max}$  with annealing time,  $t_a$ .
